# Supplementary material for: Blocking Studies to Evaluate Receptor-Specific Radioligand Binding in the CAM Model by PET and MR Imaging
Source: MDPI journal article supplement (doi:10.3390/cancers14163870), 2022-08-10
Supplement: s1 [file s1]

Article

# Blocking Studies to Evaluate Receptor-Specific Radioligand Binding in the CAM Model by PET and MR Imaging

Jessica Löffler, Hendrik Herrmann, Ellen Scheidhauer, Mareike Wirth, Anne Wasserloos, Christoph Solbach, Gerhard Glatting, Ambros J. Beer, Volker Rasche and Gordon Winter

## Supplements

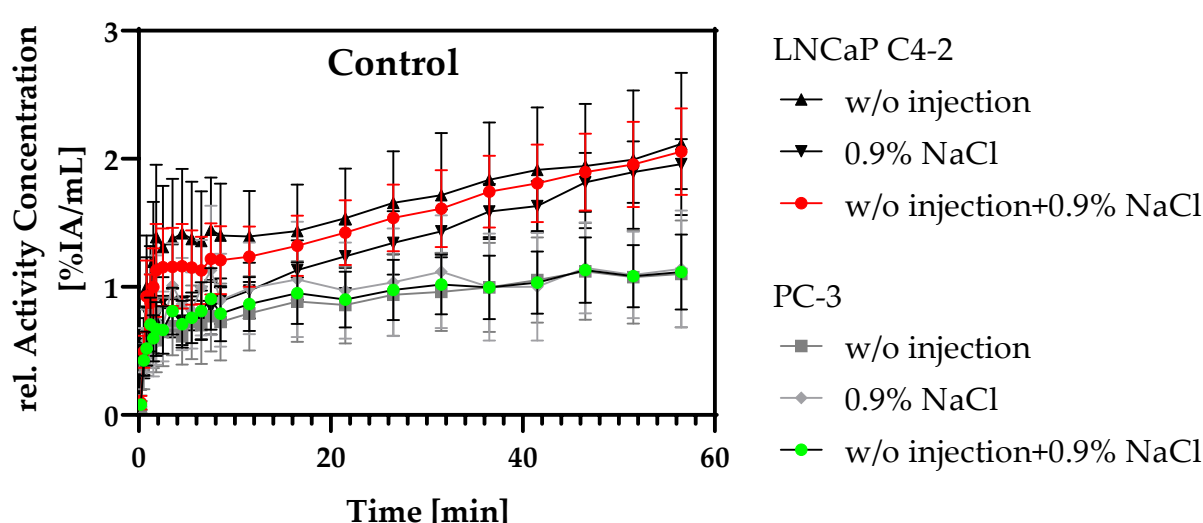

**Figure S1.** Comparison and summary of TACs of controls, with and without additional injection of 0.9% NaCl for the PSMA+ and the PSMA- tumor xenografts. While there are still substantial differences in the first 10 min post-injection, presumably due to perfusion, the curves become more and more similar during the measurement period. The increase and final accumulation do not show significant injection-dependent differences, which is why the data have been combined for further evaluation (red and green curve).

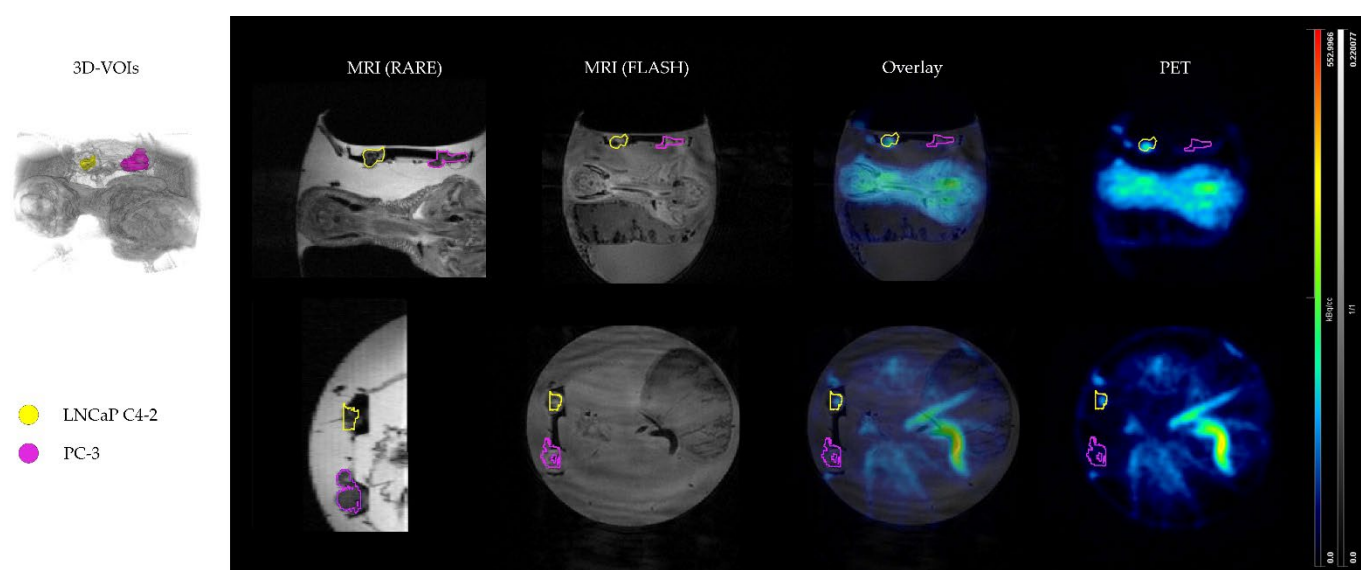

**Figure S2.** Example images for tumor VOI positioning with PMOD. VOIs were drawn based on the MRI (RARE) scans. MRI (RARE), MRI (Flash), and PET data were separately superimposed, so VOIs from RARE could also be used for the other scans. The original PMOD VOIs were mapped in the respective image sections to demonstrate reliable localization of the contours. In addition, a 3D image of the MRI scan (RARE), including the VOI regions, was added to illustrate the three-dimensional aspect of the selection.

**Table S1.** Decay corrected TAC data [%IA/mL] based on PMOD evaluation.

| Control (no 2-PMPA) [%IA/mL] |         |       |         |       |         |       |         |       |         |       |         |       |         |       |         |       |
|------------------------------|---------|-------|---------|-------|---------|-------|---------|-------|---------|-------|---------|-------|---------|-------|---------|-------|
|                              | Ctrl. 1 |       | Ctrl. 2 |       | Ctrl. 3 |       | Ctrl. 4 |       | Ctrl. 5 |       | Ctrl. 6 |       | Ctrl. 7 |       | Ctrl. 8 |       |
| Time                         | C4-2    | PC-3  |
| 10                           | 0.064   | 0.027 | 0.441   | 0.187 | 0.041   | 0.059 | 0.022   | 0.018 | 0.025   | 0.035 | 0.154   | 0.201 | 0.007   | 0.056 | 0.021   | 0.069 |
| 30                           | 0.876   | 0.311 | 0.871   | 1.037 | 0.348   | 0.390 | 0.089   | 0.076 | 0.207   | 0.071 | 0.513   | 0.772 | 0.936   | 0.563 | 0.118   | 0.181 |
| 50                           | 2.061   | 0.574 | 1.810   | 1.094 | 0.814   | 0.483 | 0.158   | 0.202 | 0.152   | 0.068 | 0.386   | 1.035 | 1.656   | 0.509 | 0.376   | 0.193 |
| 70                           | 1.692   | 0.341 | 1.918   | 1.997 | 0.624   | 0.889 | 0.429   | 0.273 | 0.188   | 0.388 | 0.622   | 0.981 | 1.068   | 0.556 | 0.474   | 0.224 |
| 90                           | 0.831   | 0.495 | 2.063   | 1.664 | 0.338   | 0.582 | 2.537   | 0.200 | 0.217   | 0.223 | 0.584   | 0.919 | 1.022   | 0.620 | 0.392   | 0.090 |
| 110                          | 0.890   | 0.746 | 1.911   | 1.499 | 0.484   | 0.218 | 3.354   | 0.158 | 0.308   | 0.297 | 0.541   | 1.655 | 0.937   | 0.550 | 0.610   | 0.251 |
| 150                          | 0.837   | 0.505 | 1.726   | 1.698 | 0.477   | 0.528 | 3.005   | 0.201 | 0.516   | 0.308 | 0.813   | 1.202 | 1.243   | 0.615 | 0.609   | 0.261 |
| 210                          | 1.124   | 0.566 | 1.619   | 1.573 | 0.437   | 0.419 | 3.063   | 0.293 | 0.623   | 0.599 | 0.583   | 1.525 | 1.177   | 1.114 | 0.631   | 0.396 |
| 270                          | 1.190   | 0.431 | 1.819   | 1.494 | 0.377   | 0.348 | 3.158   | 0.420 | 0.546   | 0.378 | 0.435   | 1.433 | 1.086   | 0.970 | 0.686   | 0.193 |
| 330                          | 0.855   | 0.554 | 1.964   | 1.854 | 0.512   | 0.449 | 2.849   | 0.494 | 0.685   | 0.266 | 0.684   | 1.298 | 1.012   | 0.877 | 0.641   | 0.271 |
| 390                          | 1.149   | 0.604 | 2.007   | 1.882 | 0.563   | 0.349 | 2.506   | 0.496 | 0.574   | 0.170 | 0.492   | 1.512 | 1.010   | 1.206 | 0.720   | 0.267 |
| 450                          | 1.003   | 0.497 | 2.061   | 1.842 | 0.593   | 0.507 | 2.737   | 0.715 | 0.839   | 0.295 | 0.566   | 1.544 | 1.258   | 1.717 | 0.698   | 0.125 |
| 510                          | 1.084   | 0.428 | 2.158   | 1.895 | 0.523   | 0.429 | 2.556   | 0.648 | 0.680   | 0.231 | 0.815   | 1.451 | 1.228   | 1.023 | 0.623   | 0.216 |
| 690                          | 1.103   | 0.717 | 2.126   | 1.911 | 0.625   | 0.526 | 2.346   | 0.571 | 0.767   | 0.247 | 0.877   | 1.543 | 1.387   | 1.104 | 0.650   | 0.320 |
| 990                          | 1.031   | 0.826 | 2.457   | 2.092 | 0.641   | 0.597 | 2.144   | 0.648 | 0.907   | 0.264 | 1.183   | 1.840 | 1.503   | 1.053 | 0.707   | 0.282 |
| 1290                         | 1.029   | 0.789 | 2.853   | 2.020 | 0.687   | 0.484 | 1.947   | 0.646 | 1.165   | 0.355 | 1.214   | 1.607 | 1.680   | 0.998 | 0.820   | 0.309 |
| 1590                         | 1.320   | 0.883 | 3.091   | 2.149 | 0.814   | 0.614 | 1.945   | 0.786 | 1.117   | 0.265 | 1.449   | 1.668 | 1.711   | 1.197 | 0.868   | 0.242 |
| 1890                         | 1.194   | 0.832 | 3.526   | 2.134 | 0.797   | 0.646 | 1.913   | 0.823 | 1.156   | 0.367 | 1.470   | 1.758 | 1.714   | 1.324 | 1.121   | 0.273 |
| 2190                         | 1.536   | 0.881 | 3.532   | 2.338 | 0.902   | 0.585 | 1.815   | 0.834 | 1.399   | 0.340 | 1.613   | 1.696 | 1.953   | 1.048 | 1.203   | 0.254 |
| 2490                         | 1.592   | 0.986 | 3.751   | 2.325 | 0.900   | 0.714 | 1.906   | 0.869 | 1.423   | 0.377 | 1.845   | 1.745 | 1.805   | 0.963 | 1.244   | 0.294 |
| 2790                         | 1.568   | 0.958 | 3.762   | 2.586 | 0.955   | 0.719 | 1.997   | 0.922 | 1.435   | 0.425 | 1.961   | 1.782 | 2.123   | 1.110 | 1.363   | 0.551 |
| 3090                         | 1.360   | 0.913 | 4.082   | 2.490 | 1.051   | 0.654 | 1.920   | 0.866 | 1.553   | 0.462 | 1.974   | 1.677 | 2.266   | 1.093 | 1.446   | 0.511 |
| 3390                         | 1.751   | 0.943 | 4.235   | 2.719 | 0.997   | 0.711 | 2.029   | 0.828 | 1.570   | 0.309 | 2.236   | 1.865 | 2.058   | 1.261 | 1.583   | 0.294 |

**Table S2.** Decay corrected TAC data [%IA/mL] based on PMOD evaluation.

| 0.005 $\mu$ M 2-PMPA [%IA/mL] |       |       |       |       |       |       |       |       |       |       |
|-------------------------------|-------|-------|-------|-------|-------|-------|-------|-------|-------|-------|
| 1                             |       | 2     |       | 3     |       | 4     |       | 5     |       |       |
| Time                          | C4-2  | PC-3  |
| 10                            | 0.062 | 0.015 | 0.029 | 0.022 | 0.029 | 0.024 | 0.080 | 0.095 | 0.038 | 0.096 |
| 30                            | 0.246 | 0.087 | 0.785 | 1.893 | 0.300 | 0.190 | 0.604 | 0.497 | 0.326 | 0.198 |
| 50                            | 1.725 | 0.417 | 0.915 | 1.459 | 0.770 | 0.034 | 0.265 | 0.397 | 0.999 | 0.532 |
| 70                            | 1.054 | 0.462 | 0.820 | 1.026 | 0.793 | 0.393 | 0.421 | 0.112 | 0.611 | 0.475 |
| 90                            | 1.185 | 0.181 | 0.311 | 0.594 | 0.936 | 0.141 | 0.198 | 0.144 | 0.777 | 0.606 |
| 110                           | 0.805 | 0.364 | 0.885 | 0.736 | 1.087 | 0.360 | 0.455 | 0.082 | 0.884 | 0.268 |
| 150                           | 0.952 | 0.288 | 0.796 | 1.056 | 1.060 | 0.176 | 0.382 | 0.193 | 0.559 | 0.430 |
| 210                           | 1.278 | 0.356 | 0.706 | 1.011 | 1.092 | 0.117 | 0.496 | 0.157 | 0.535 | 0.255 |
| 270                           | 0.940 | 0.304 | 0.985 | 0.984 | 0.997 | 0.334 | 0.270 | 0.061 | 0.703 | 0.368 |
| 330                           | 1.067 | 0.379 | 1.045 | 0.940 | 1.196 | 0.545 | 0.374 | 0.343 | 0.571 | 0.322 |
| 390                           | 1.141 | 0.360 | 1.090 | 0.780 | 1.670 | 0.439 | 0.516 | 0.129 | 0.869 | 0.313 |
| 450                           | 1.458 | 0.237 | 1.034 | 1.152 | 1.630 | 0.171 | 0.439 | 0.080 | 0.649 | 0.451 |
| 510                           | 1.443 | 0.375 | 1.342 | 1.151 | 1.939 | 0.508 | 0.324 | 0.087 | 0.767 | 0.491 |
| 690                           | 1.487 | 0.480 | 1.444 | 1.059 | 1.835 | 0.325 | 0.324 | 0.238 | 1.141 | 0.497 |
| 990                           | 1.923 | 0.623 | 1.561 | 1.278 | 1.652 | 0.253 | 0.422 | 0.189 | 1.220 | 0.456 |
| 1290                          | 2.100 | 0.785 | 1.848 | 1.261 | 1.487 | 0.286 | 0.609 | 0.205 | 1.645 | 0.615 |
| 1590                          | 2.144 | 0.813 | 1.972 | 1.295 | 1.386 | 0.301 | 0.426 | 0.121 | 1.698 | 0.688 |
| 1890                          | 2.353 | 0.732 | 2.045 | 1.455 | 1.401 | 0.464 | 0.498 | 0.121 | 1.895 | 0.665 |
| 2190                          | 2.404 | 0.977 | 2.176 | 1.455 | 1.590 | 0.326 | 0.442 | 0.215 | 1.870 | 0.661 |
| 2490                          | 2.560 | 1.051 | 2.317 | 1.530 | 1.594 | 0.476 | 0.488 | 0.237 | 1.791 | 0.671 |
| 2790                          | 2.237 | 0.966 | 2.471 | 1.519 | 1.427 | 0.503 | 0.501 | 0.204 | 2.129 | 0.832 |
| 3090                          | 2.378 | 0.967 | 2.550 | 1.406 | 1.395 | 0.515 | 0.536 | 0.187 | 2.216 | 0.677 |
| 3390                          | 2.418 | 1.065 | 2.675 | 1.391 | 1.542 | 0.473 | 0.730 | 0.364 | 1.857 | 0.627 |

**Table S3.** Decay corrected TAC data [%IA/mL] based on PMOD evaluation.

| 0.05 $\mu$ M 2-PMPA [%IA/mL] |       |       |       |       |       |       |       |       |       |       |
|------------------------------|-------|-------|-------|-------|-------|-------|-------|-------|-------|-------|
|                              | 1     |       | 2     |       | 3     |       | 4     |       | 5     |       |
| Time                         | C4-2  | PC-3  |
| 10                           | 0.026 | 0.037 | 0.173 | 0.036 | 0.024 | 0.175 | 0.328 | 0.031 | 0.023 | 0.401 |
| 30                           | 0.267 | 0.703 | 1.650 | 0.162 | 0.152 | 0.445 | 0.442 | 0.267 | 0.349 | 1.056 |
| 50                           | 3.154 | 2.034 | 1.474 | 0.667 | 0.726 | 0.587 | 1.132 | 1.645 | 0.979 | 0.907 |
| 70                           | 2.803 | 2.322 | 1.680 | 0.777 | 0.600 | 0.327 | 1.784 | 1.739 | 0.731 | 0.922 |
| 90                           | 2.700 | 1.474 | 0.862 | 0.892 | 0.727 | 0.200 | 2.156 | 1.639 | 0.558 | 1.286 |
| 110                          | 2.754 | 1.492 | 0.719 | 0.368 | 0.419 | 0.523 | 1.785 | 0.945 | 0.783 | 0.698 |
| 150                          | 2.629 | 1.683 | 0.728 | 0.835 | 0.598 | 0.401 | 2.034 | 1.585 | 1.048 | 0.980 |
| 210                          | 2.315 | 1.971 | 0.963 | 0.659 | 0.846 | 0.809 | 1.913 | 1.327 | 0.752 | 0.947 |
| 270                          | 2.463 | 1.885 | 0.790 | 0.487 | 0.481 | 0.655 | 1.972 | 1.732 | 0.998 | 0.835 |
| 330                          | 2.910 | 2.012 | 0.675 | 0.759 | 0.534 | 0.570 | 1.905 | 1.385 | 1.038 | 0.851 |
| 390                          | 2.513 | 1.796 | 0.789 | 0.577 | 0.308 | 0.386 | 1.928 | 1.287 | 1.011 | 0.948 |
| 450                          | 2.613 | 2.181 | 0.792 | 0.374 | 0.681 | 0.650 | 1.838 | 1.397 | 0.986 | 0.809 |
| 510                          | 2.389 | 2.179 | 0.677 | 0.493 | 0.860 | 0.456 | 1.869 | 1.344 | 0.837 | 0.766 |
| 690                          | 2.849 | 2.103 | 0.889 | 0.445 | 0.824 | 0.848 | 2.060 | 1.506 | 1.378 | 1.031 |
| 990                          | 2.764 | 2.337 | 0.900 | 0.361 | 0.712 | 0.722 | 2.273 | 1.747 | 1.728 | 1.075 |
| 1290                         | 2.562 | 2.625 | 1.227 | 0.376 | 0.949 | 0.936 | 2.584 | 1.913 | 1.922 | 1.002 |
| 1590                         | 2.669 | 2.703 | 1.229 | 0.350 | 0.817 | 1.317 | 2.707 | 1.991 | 1.932 | 1.103 |
| 1890                         | 2.766 | 2.876 | 1.591 | 0.371 | 0.858 | 1.432 | 2.863 | 2.256 | 2.424 | 1.404 |
| 2190                         | 2.782 | 3.022 | 1.679 | 0.465 | 1.036 | 1.464 | 2.998 | 2.250 | 2.873 | 1.444 |
| 2490                         | 3.007 | 3.185 | 1.369 | 0.596 | 1.132 | 1.612 | 3.288 | 2.184 | 3.318 | 1.445 |
| 2790                         | 3.222 | 2.751 | 1.626 | 0.469 | 1.362 | 1.599 | 3.293 | 2.660 | 3.382 | 1.460 |
| 3090                         | 3.389 | 2.779 | 1.554 | 0.627 | 1.377 | 1.466 | 3.366 | 2.523 | 3.515 | 1.389 |
| 3390                         | 3.377 | 2.890 | 1.515 | 0.631 | 1.312 | 1.477 | 3.479 | 2.509 | 3.192 | 1.348 |

**Table S4.** Decay corrected TAC data [%IA/mL] based on PMOD evaluation.

| 0.5 $\mu$ M 2-PMPA [%IA/mL] |       |       |       |       |       |       |       |       |
|-----------------------------|-------|-------|-------|-------|-------|-------|-------|-------|
|                             | 1     |       | 2     |       | 3     |       | 4     |       |
| Time                        | C4-2  | PC-3  | C4-2  | PC-3  | C4-2  | PC-3  | C4-2  | PC-3  |
| 10                          | 0.202 | 0.627 | 0.020 | 0.009 | 0.158 | 0.012 | 0.072 | 0.000 |
| 30                          | 0.697 | 1.352 | 1.987 | 0.270 | 0.637 | 0.469 | 0.617 | 1.873 |
| 50                          | 0.490 | 1.830 | 2.810 | 0.842 | 1.086 | 1.174 | 1.136 | 2.240 |
| 70                          | 0.636 | 1.474 | 1.357 | 1.181 | 1.821 | 0.954 | 0.895 | 1.372 |
| 90                          | 1.068 | 0.639 | 1.685 | 0.846 | 1.305 | 0.645 | 0.990 | 1.314 |
| 110                         | 0.376 | 1.023 | 1.838 | 0.785 | 1.240 | 0.901 | 0.849 | 2.095 |
| 150                         | 0.757 | 0.975 | 1.535 | 0.768 | 1.075 | 1.049 | 0.955 | 1.098 |
| 210                         | 0.736 | 0.860 | 1.462 | 0.785 | 0.999 | 1.334 | 0.624 | 1.064 |
| 270                         | 0.727 | 1.000 | 1.228 | 0.735 | 0.582 | 0.986 | 1.042 | 0.418 |
| 330                         | 0.877 | 0.848 | 1.137 | 0.949 | 0.616 | 1.108 | 0.655 | 1.244 |
| 390                         | 0.924 | 1.067 | 1.353 | 1.050 | 0.447 | 1.187 | 0.790 | 0.971 |
| 450                         | 0.845 | 0.772 | 1.154 | 0.987 | 0.718 | 0.509 | 0.745 | 0.675 |
| 510                         | 0.847 | 0.744 | 1.092 | 1.224 | 0.407 | 0.727 | 1.039 | 1.169 |
| 690                         | 1.132 | 1.194 | 1.260 | 1.112 | 0.581 | 0.642 | 0.841 | 1.175 |
| 990                         | 1.447 | 1.275 | 1.073 | 1.273 | 0.652 | 0.720 | 1.062 | 1.258 |
| 1290                        | 1.433 | 1.358 | 0.953 | 1.629 | 0.732 | 0.899 | 1.358 | 1.363 |
| 1590                        | 1.360 | 1.402 | 0.913 | 1.784 | 0.845 | 0.806 | 1.319 | 1.189 |
| 1890                        | 1.426 | 1.544 | 0.900 | 1.443 | 0.767 | 0.390 | 1.372 | 1.329 |
| 2190                        | 1.537 | 1.718 | 0.830 | 1.678 | 0.914 | 0.756 | 1.442 | 1.477 |
| 2490                        | 1.641 | 1.798 | 0.894 | 1.613 | 0.821 | 0.751 | 1.444 | 1.495 |
| 2790                        | 1.566 | 1.646 | 0.892 | 1.653 | 0.910 | 0.914 | 1.455 | 1.706 |
| 3090                        | 1.970 | 1.827 | 1.062 | 1.825 | 1.024 | 0.619 | 1.679 | 1.581 |
| 3390                        | 1.699 | 1.857 | 0.994 | 1.611 | 0.822 | 0.771 | 1.405 | 1.471 |

**Table S5.** Decay corrected TAC data [%IA/mL] based on PMOD evaluation.

| 50 $\mu$ M 2-PMPA [%IA/mL] |       |       |       |       |       |       |       |       |       |       |
|----------------------------|-------|-------|-------|-------|-------|-------|-------|-------|-------|-------|
|                            | 1     |       | 2     |       | 3     |       | 4     |       | 5     |       |
| Time                       | C4-2  | PC-3  |
| 10                         | 0.080 | 0.050 | 0.012 | 0.011 | 0.079 | 0.015 | 0.025 | 0.046 | 0.035 | 0.017 |
| 30                         | 0.026 | 0.074 | 0.039 | 0.055 | 0.276 | 0.073 | 0.073 | 0.141 | 1.127 | 0.492 |
| 50                         | 0.215 | 0.182 | 0.333 | 0.925 | 9.388 | 0.138 | 0.046 | 0.117 | 1.692 | 1.269 |
| 70                         | 0.778 | 1.572 | 0.727 | 0.987 | 4.062 | 0.802 | 0.269 | 0.131 | 2.283 | 1.489 |
| 90                         | 1.004 | 1.278 | 1.015 | 0.893 | 3.916 | 1.230 | 0.177 | 0.265 | 2.185 | 1.095 |
| 110                        | 0.545 | 1.149 | 0.766 | 0.952 | 2.491 | 0.837 | 0.122 | 0.140 | 1.664 | 1.374 |
| 150                        | 0.890 | 1.340 | 0.820 | 0.663 | 2.730 | 0.604 | 0.163 | 0.194 | 1.677 | 1.310 |
| 210                        | 0.742 | 0.831 | 0.557 | 0.710 | 2.758 | 0.498 | 0.147 | 0.144 | 1.625 | 1.347 |
| 270                        | 0.839 | 0.934 | 0.777 | 0.826 | 2.744 | 0.526 | 0.131 | 0.162 | 1.870 | 1.157 |
| 330                        | 1.159 | 1.206 | 0.621 | 1.024 | 2.374 | 0.508 | 0.153 | 0.139 | 1.534 | 1.321 |
| 390                        | 0.650 | 1.210 | 0.894 | 1.152 | 2.315 | 0.670 | 0.151 | 0.243 | 1.159 | 1.200 |
| 450                        | 0.685 | 0.949 | 0.711 | 0.752 | 2.583 | 0.512 | 0.224 | 0.153 | 1.345 | 1.294 |
| 510                        | 1.179 | 1.059 | 0.812 | 0.896 | 2.283 | 0.676 | 0.185 | 0.225 | 1.351 | 1.262 |
| 690                        | 0.947 | 1.276 | 0.818 | 0.782 | 2.793 | 0.670 | 0.186 | 0.207 | 1.512 | 1.359 |
| 990                        | 1.301 | 1.229 | 0.722 | 0.876 | 2.767 | 0.740 | 0.201 | 0.259 | 1.588 | 1.572 |
| 1290                       | 1.238 | 1.555 | 0.729 | 0.759 | 2.514 | 0.804 | 0.324 | 0.279 | 1.684 | 1.576 |
| 1590                       | 1.260 | 1.343 | 0.598 | 0.979 | 2.703 | 0.934 | 0.334 | 0.342 | 1.974 | 1.696 |
| 1890                       | 1.545 | 1.617 | 0.874 | 1.013 | 2.407 | 1.023 | 0.392 | 0.321 | 2.093 | 1.759 |
| 2190                       | 1.853 | 1.436 | 0.914 | 0.926 | 2.267 | 1.339 | 0.415 | 0.424 | 2.069 | 1.930 |
| 2490                       | 1.980 | 1.635 | 1.047 | 1.039 | 2.123 | 1.486 | 0.370 | 0.350 | 2.115 | 2.208 |
| 2790                       | 2.241 | 1.300 | 1.025 | 1.025 | 2.272 | 1.707 | 0.391 | 0.397 | 2.090 | 2.156 |
| 3090                       | 2.504 | 1.597 | 1.291 | 1.100 | 2.469 | 1.668 | 0.505 | 0.333 | 2.297 | 2.227 |
| 3390                       | 2.250 | 1.683 | 1.057 | 1.214 | 2.392 | 2.014 | 0.414 | 0.356 | 2.295 | 2.025 |
